# Supplementary material
Source: PubMed Central journal article supplement (PMC9973000)
Supplement: jvi.01975-22-s0001.pdf [file jvi.01975-22-s0001.pdf]

**Figure S1**

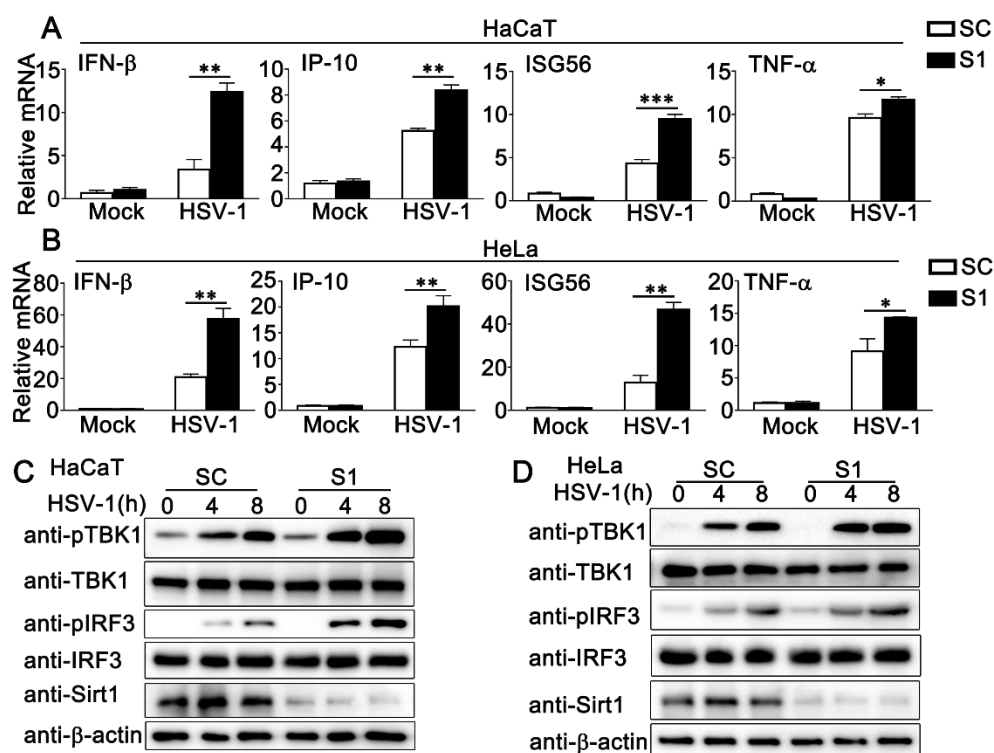

**Figure S1 Sirt1 knockdown promotes HSV-1-induced innate immune responses in HaCaT and HeLa cells.**

A HaCaT cells were transfected with control siRNA (SC) or Sirt1-specific siRNA (S1) for 24 h, and then infected with HSV-1 (MOI=1) or left uninfected for 4 h. The cells were lysed for real-time PCR analyses.

B HeLa cells were transfected with control siRNA (SC) or Sirt1-specific siRNA (S1) for 24 h, and then infected with HSV-1 (MOI=1) or left uninfected for 4 h. The cells were lysed for real-time PCR analyses.

C HaCaT cells were transfected with control siRNA (SC) or Sirt1-specific siRNA (S1) for 24 h, and then infected with HSV-1 (MOI=1) or left uninfected for 4 h. The cell lysates were subjected to immunoblot analysis.

D HeLa cells were transfected with control siRNA (SC) or Sirt1-specific siRNA (S1)

for 24 h, and then infected with HSV-1 (MOI=1) or left uninfected for 4 h. The cell lysates were subjected to immunoblot analysis.

$\beta$ -actin served as a loading control in all the immunoblot assays. The data are representative of three independent experiments and are presented as mean  $\pm$  SD. \* $p$  < 0.05, \*\* $p$  < 0.01, \*\*\* $p$  < 0.001.

**Figure S2**

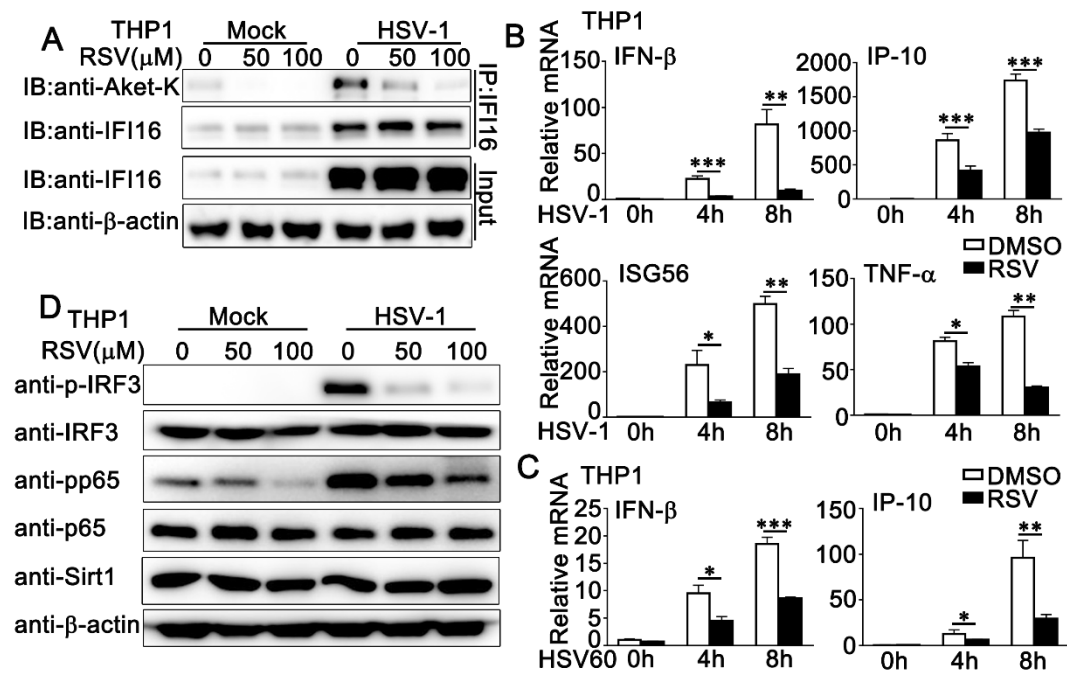

**Figure S2 Sirt1 activator RSV inhibits HSV-1- or HSV60-induced innate immune responses**

A PMA-THP1 cells were treated with increasing amounts of Resveratrol (RSV) (0, 50, and 100 μM) for 12 h, and then infected with HSV-1(MOI=1) for another 12 h. The cells were subjected to immunoprecipitation (IP) and immunoblot (IB) analysis.

B PMA-THP1 cells were treated with Resveratrol (RSV) (100 μM) for 12 h and then infected with HSV-1(MOI=1) for indicated periods. Afterward, the cells were lysed for real-time PCR analysis.

C PMA-THP1 cells were treated with Resveratrol (RSV) (100 μM) for 12 h and then transfected with HSV60 (1 μg/ml) for indicated periods. Afterward, real-time PCR analysis was performed.

D PMA-THP1 cells were treated with increasing amounts of Resveratrol (RSV) (0, 50, and 100 μM) for 12 h, and then infected with HSV-1(MOI=1) for another 8 h. The cells

were subjected to immunoblot analysis.

$\beta$ -actin served as a loading control in all the immunoblot assays. The data are representative of three independent experiments and are presented as mean  $\pm$  SD. \* $p$  < 0.05, \*\* $p$  < 0.01, \*\*\* $p$  < 0.001.

Figure S3

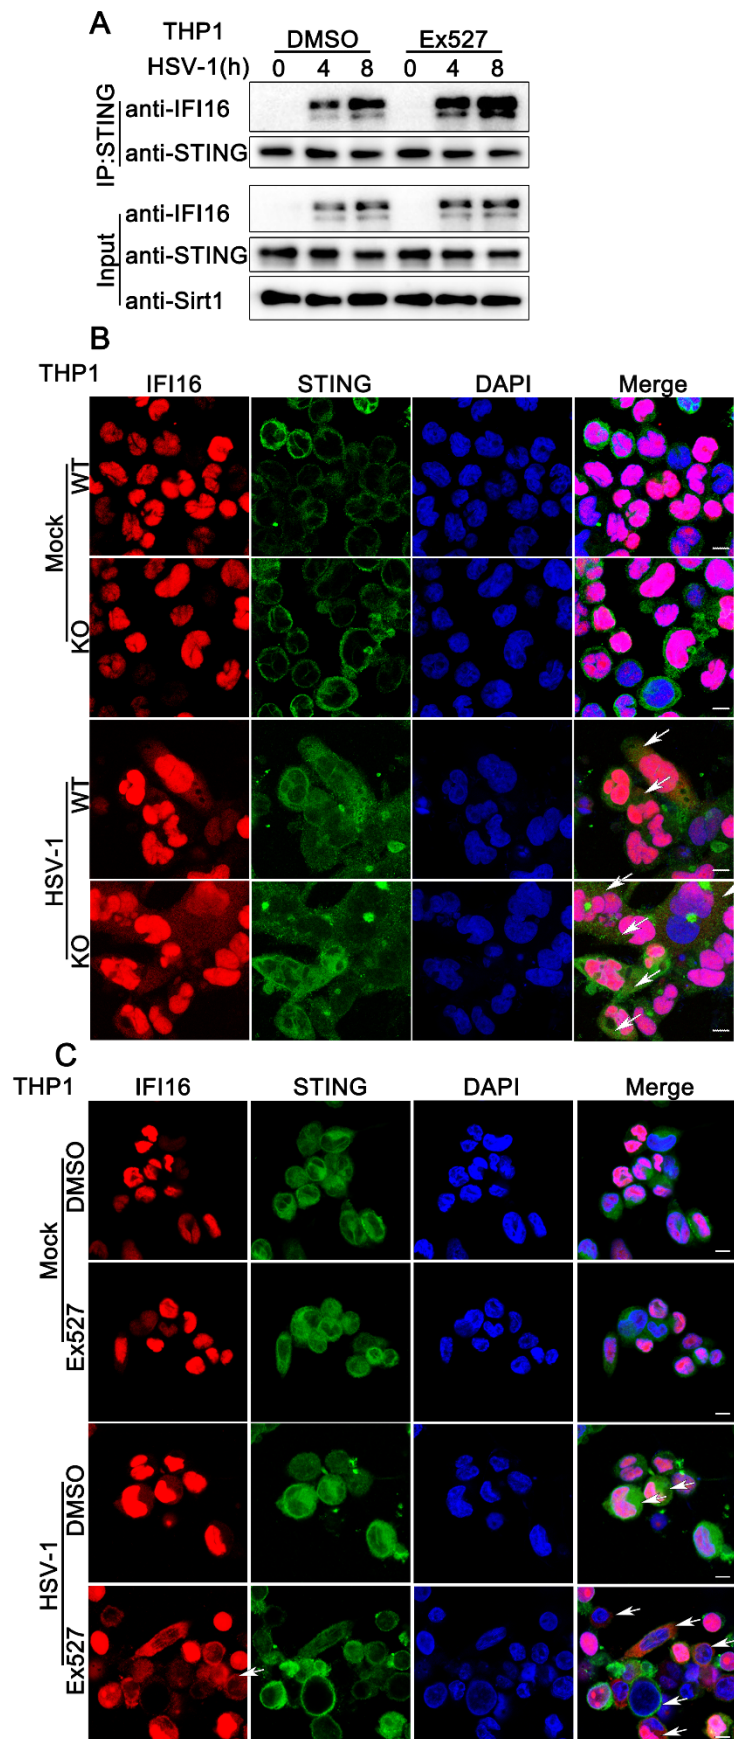

**Figure S3 Sirt1 regulates IFI16-STING interaction.**

A PMA-THP1 cells were treated with control DMSO or Ex527 (5 $\mu$ M) for 12 h and then infected with HSV-1 (MOI=1) for indicated periods. Afterward, immunoprecipitation (IP) and immunoblot (IB) analysis were performed.

B Wild-type (WT) and Sirt1-deficient (KO) PMA-THP1 cells were infected with HSV-1 (MOI=1) or left uninfected for 8 h. Immunofluorescence was performed using anti-IFI16 (red) and anti-STING (green). Nuclei were stained with DAPI. Scale bars in the merge are 10 $\mu$ m. White arrows point at occurrences of cytoplasmic IFI16.

C PMA-THP1 cells were treated with control DMSO or Ex527 (5 $\mu$ M) for 12 h and then infected with HSV-1 (MOI=1) for 8 h. Immunofluorescence was performed using anti-IFI16 (red) and anti-STING (green). Nuclei were stained with DAPI. Scale bars in the merge are 10 $\mu$ m. White arrows point at occurrences of cytoplasmic IFI16.

The data are representative of three independent experiments.

**Figure S4**

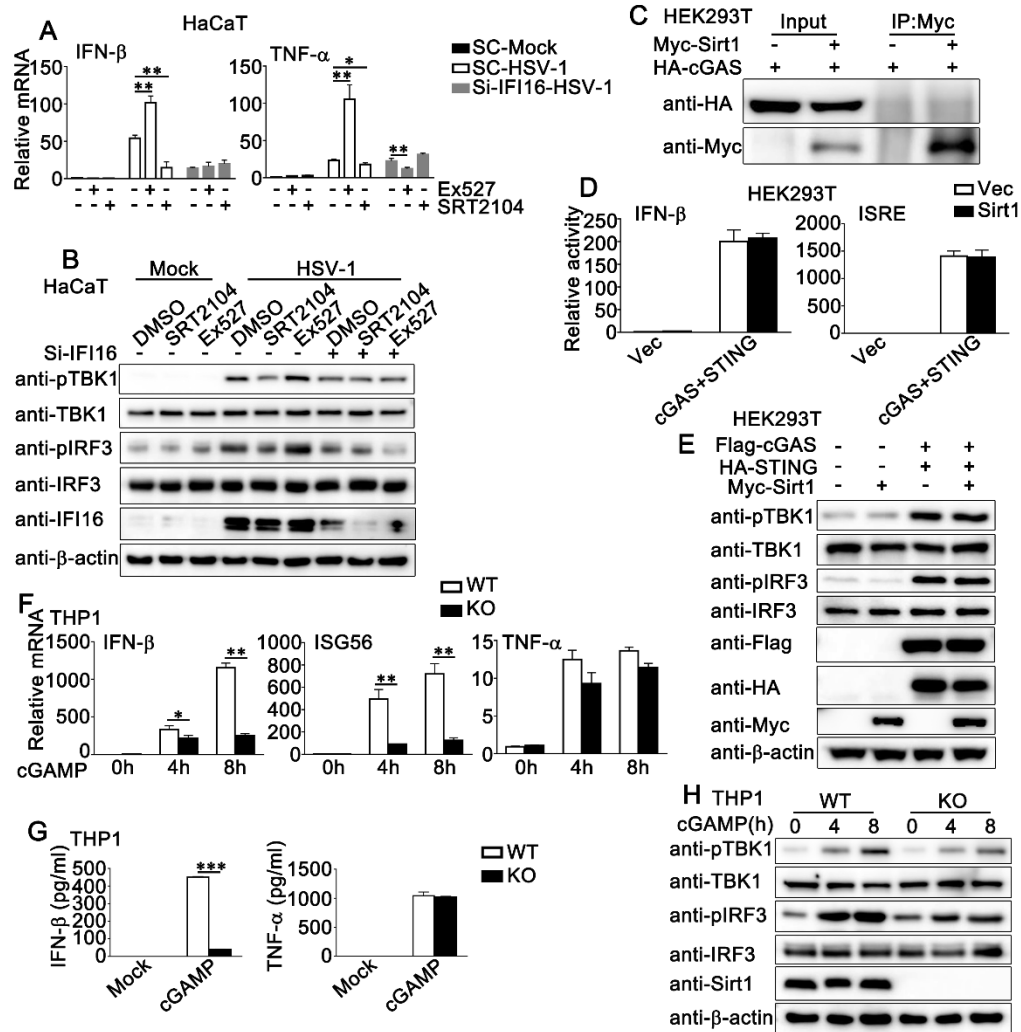

**Figure S4 Sirt1 inhibits DNA virus- or viral DNA-triggered innate immune responses in an IFI16-dependent pattern.**

A HaCaT cells were treated with control DMSO, Ex527 (5 $\mu$ M), or SRT2104 (5 $\mu$ M) for 12 h, and then transfected with control siRNA (SC) or IFI16-specific siRNA for 24 h. The cells were infected with HSV-1 (MOI=1) or left uninfected for another 8 h and then lysed for real-time PCR analyses.

B HaCaT cells were treated with control DMSO, Ex527 (5 $\mu$ M), or SRT2104 (5 $\mu$ M) for 12 h, and then transfected with control siRNA (SC) or IFI16-specific siRNA for 24 h.

The cells were infected with HSV-1 (MOI=1) or left uninfected for another 8 h and then subjected to immunoblot analysis.

C HEK293T cells were transfected with indicated plasmids. 24 h later, immunoprecipitation (IP) and immunoblot (IB) analysis were performed.

D HEK293T cells were transfected with Vector (Vec) or Sirt1, and IFN- $\beta$  or ISRE luciferase reporter, with or without the cGAS and STING expressing plasmids. At 24 h after transfection, the cells were lysed for luciferase assay.

E HEK293T cells were transfected with Vector (Vec) or Sirt1, together with or without the cGAS and STING-expressing plasmids. At 24 h after transfection, the cell lysates were subjected to immunoblot analysis.

F Wild-type (WT) and Sirt1-deficient (KO) PMA-THP1 cells were stimulated with cGAMP (1 $\mu$ g/ml) for indicated periods. Then the cells were lysed for real-time PCR analysis.

G Wild-type (WT) and Sirt1-deficient (KO) PMA-THP1 cells were stimulated with cGAMP (1 $\mu$ g/ml) for 24 h. The supernatants were collected and subjected to ELISA analysis.

H Wild-type (WT) and Sirt1-deficient (KO) PMA-THP1 cells were stimulated with cGAMP (1 $\mu$ g/ml) for indicated periods. Then the cell lysates were subjected to immunoblot analysis.

$\beta$ -actin served as a loading control in all the immunoblot assays. The data are representative of three independent experiments and are presented as mean  $\pm$  SD. \* $p$  < 0.05, \*\* $p$  < 0.01, \*\*\* $p$  < 0.001.
